# Supplementary material for: Andrographolide-loaded silk fibroin nanoparticles
Source: Royal Society of Chemistry journal article supplement (doi:10.1039/c8ra04156c), 2018-01-01
Supplement: c8ra04156c1.pdf [file c8ra04156c1.pdf]

## Supporting Information

### Andrographolide-loaded silk fibroin nanoparticles

XU Zhongyu<sup>a</sup>, REN Jiangmeng<sup>a\*</sup>, JING Qiufang<sup>a</sup>, REN Fuzheng<sup>a</sup>, Huang Mengting<sup>a</sup>, Ding Wenrui<sup>a</sup> and ZENG Bubing<sup>a\*</sup>

<sup>a</sup> School of Pharmacy, East China University of Science and Technology, Shanghai, 200237, P. R. China.

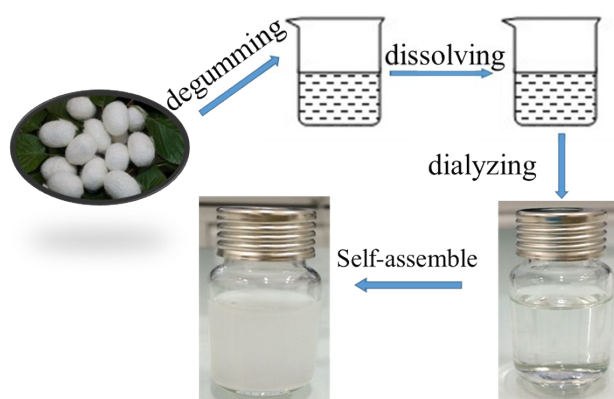

**Figure S1** general production of RSF nanoparticles

**Table S1** infrared spectroscopy data of different silk fibroin status<sup>1</sup>

| Entry             | Amides I (cm <sup>-1</sup> ) | Amides II (cm <sup>-1</sup> ) | Amides III (cm <sup>-1</sup> ) |
|-------------------|------------------------------|-------------------------------|--------------------------------|
| $\beta$ -sheet    | 1625-1640                    | 1515-1525                     | 1265                           |
| $\alpha$ -helices | 1650-1658                    | 1545                          | 1240                           |
| Random coil       | 1640-1648                    | 1535-1545                     | 1235                           |

1. Y.-Q. Z. HaiYan Wang, *Soft Matter*, 2013, 9, 138-145.

**Table S2** Characteristic of AP-loaded RSF nanoparticles suspension

| Entry | RSF<br>concentr | AP<br>concentr | mPEGN<br>H <sub>2</sub> (%) | ethanol<br>: | freezing<br>time | volume-<br>Mean | variance<br>(P.I.) |
|-------|-----------------|----------------|-----------------------------|--------------|------------------|-----------------|--------------------|
| 1     | 0.5             | 2              | 5%                          | 0.2          | 5                | 528.2           | 0.108              |
| 2     | 0.5             | 4              | 10%                         | 0.25         | 10               | 423.9           | 0.002              |
| 3     | 0.5             | 6              | 20%                         | 0.4          | 20               | 332.0           | 0.107              |
| 4     | 0.5             | 7              | 30%                         | 0.5          | 24               | 947.7           | 0.664              |
| 5     | 1               | 2              | 10%                         | 0.4          | 24               | 322.8           | 0.097              |
| 6     | 1               | 4              | 5%                          | 0.5          | 20               | 996.9           | 0.410              |
| 7     | 1               | 6              | 30%                         | 0.2          | 10               | 378.7           | 0.412              |
| 8     | 1               | 7              | 20%                         | 0.25         | 5                | 623.0           | 0.477              |
| 9     | 2               | 2              | 20%                         | 0.5          | 10               | >1000           | /                  |
| 10    | 2               | 4              | 30%                         | 0.4          | 5                | 238.9           | 0.312              |
| 11    | 2               | 6              | 5%                          | 0.25         | 24               | 503.4           | 0.333              |
| 12    | 2               | 7              | 10%                         | 0.2          | 20               | 893.9           | 0.254              |
| 13    | 3               | 2              | 30%                         | 0.25         | 20               | 495.7           | 0.479              |
| 14    | 3               | 4              | 20%                         | 0.2          | 24               | 495.7           | 0.479              |
| 15    | 3               | 6              | 10%                         | 0.5          | 5                | >1000           | /                  |
| 16    | 3               | 7              | 5%                          | 0.4          | 10               | 372.0           | 0.172              |

VOLUME-Weighted GAUSSIAN DISTRIBUTION Analysis (Solid Particle)

GAUSSIAN SUMMARY:

|                   |                    |                     |                                |
|-------------------|--------------------|---------------------|--------------------------------|
| Mean Diameter     | = 528.2 nm         | Variance (P.I.)     | = 0.108                        |
| Std. Deviation    | = 173.8 nm (32.9%) | Chi Squared         | = 2.558                        |
| Norm. Std. Dev.   | = 0.329            | Baseline Adj.       | = 0.000 %                      |
| (Coeff. of Var'n) |                    | Z-Avg. Diff. Coeff. | = 9.78E-009 cm <sup>2</sup> /s |

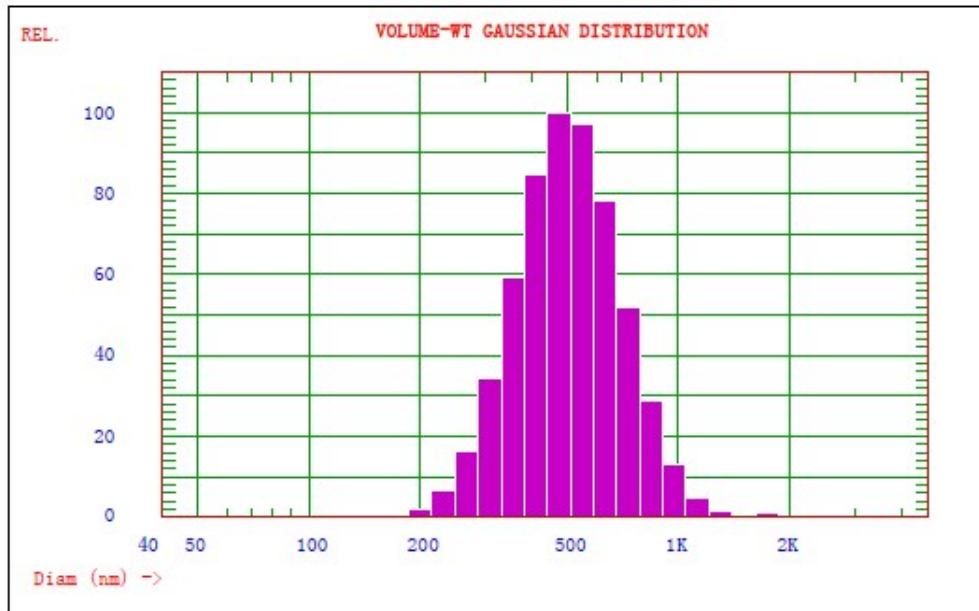

Run\_Sample

Cumulative Result:

25 % of distribution < 400.6 nm  
50 % of distribution < 500.1 nm  
75 % of distribution < 624.4 nm  
90 % of distribution < 762.4 nm  
99 % of distribution < 1075.1 nm  
80 % of distribution < 659.7 nm

Figure S2. AP-loaded RSF nanoparticles sizing distribution of No.1

VOLUME-Weighted GAUSSIAN DISTRIBUTION Analysis (Solid Particle)

GAUSSIAN SUMMARY:

|                   |                   |                     |                                |
|-------------------|-------------------|---------------------|--------------------------------|
| Mean Diameter     | = 423.9 nm        | Variance (P.I.)     | = 0.021                        |
| Std. Deviation    | = 61.5 nm (14.5%) | Chi Squared         | = 1.843                        |
| Norm. Std. Dev.   | = 0.145           | Baseline Adj.       | = 0.861 %                      |
| (Coeff. of Var'n) |                   | Z-Avg. Diff. Coeff. | = 1.12E-008 cm <sup>2</sup> /s |

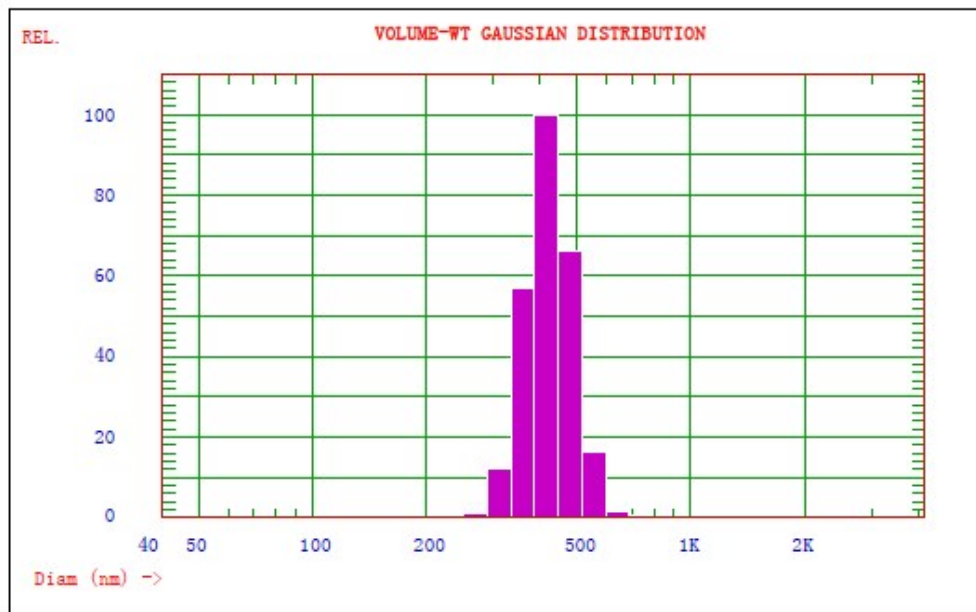

Run\_Sample

Cumulative Result:

25 % of distribution < 380.2 nm  
50 % of distribution < 419.2 nm  
75 % of distribution < 462.3 nm  
90 % of distribution < 504.9 nm  
99 % of distribution < 587.4 nm  
80 % of distribution < 473.7 nm

Figure S3. AP-loaded RSF nanoparticles sizing distribution of No.2

VOLUME-Weighted GAUSSIAN DISTRIBUTION Analysis (Solid Particle)

GAUSSIAN SUMMARY:

|                   |                    |                     |                                |
|-------------------|--------------------|---------------------|--------------------------------|
| Mean Diameter     | = 332.0 nm         | Variance (P.I.)     | = 0.107                        |
| Std. Deviation    | = 108.5 nm (32.7%) | Chi Squared         | = 4.371                        |
| Norm. Std. Dev.   | = 0.327            | Baseline Adj.       | = 0.918 %                      |
| (Coeff. of Var'n) |                    | Z-Avg. Diff. Coeff. | = 1.48E-008 cm <sup>2</sup> /s |

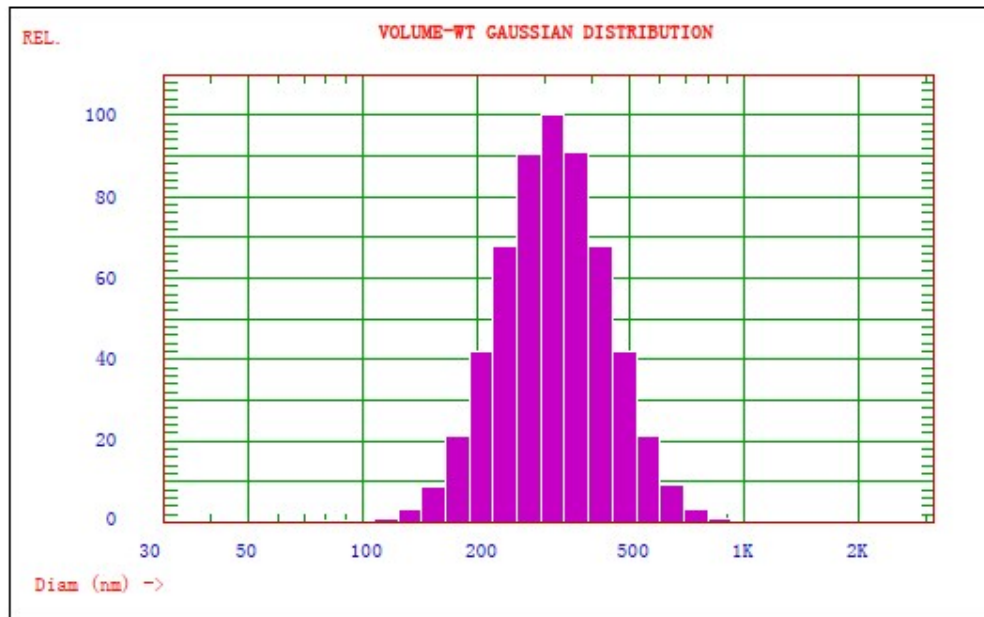

2016101201.3

Cumulative Result:

25 % of distribution < 252.3 nm  
50 % of distribution < 314.5 nm  
75 % of distribution < 392.1 nm  
90 % of distribution < 478.2 nm  
99 % of distribution < 673.0 nm  
80 % of distribution < 414.1 nm

Figure S4. AP-loaded RSF nanoparticles sizing distribution of No.3

VOLUME-Weighted GAUSSIAN DISTRIBUTION Analysis (Solid Particle)

GAUSSIAN SUMMARY:

|                   |                    |                     |                                |
|-------------------|--------------------|---------------------|--------------------------------|
| Mean Diameter     | = 947.7 nm         | Variance (P.I.)     | = 0.664                        |
| Std. Deviation    | = 772.4 nm (81.5%) | Chi Squared         | = 2.404                        |
| Norm. Std. Dev.   | = 0.815            | Baseline Adj.       | = 0.033 %                      |
| (Coeff. of Var'n) |                    | Z-Avg. Diff. Coeff. | = 7.62E-009 cm <sup>2</sup> /s |

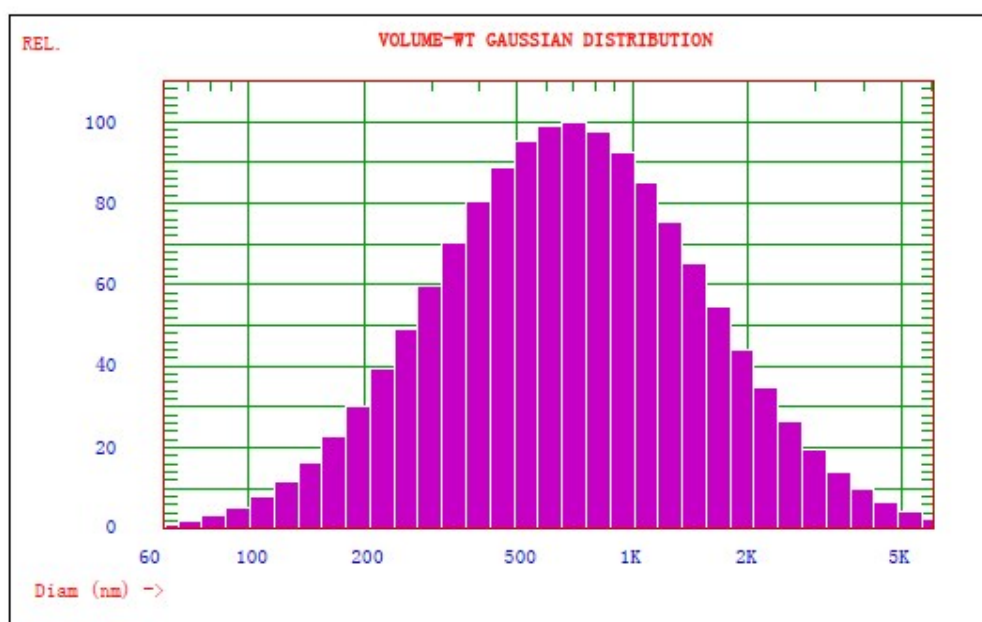

Run\_Sample

Cumulative Result:

25 % of distribution < 393.3 nm  
50 % of distribution < 678.9 nm  
75 % of distribution < 1171.4 nm  
90 % of distribution < 1905.2 nm  
99 % of distribution < 4120.7 nm  
80 % of distribution < 1340.2 nm

Figure S5. AP-loaded RSF nanoparticles sizing distribution of No.4

VOLUME-Weighted GAUSSIAN DISTRIBUTION Analysis (Solid Particle)

GAUSSIAN SUMMARY:

|                   |                    |                     |                                |
|-------------------|--------------------|---------------------|--------------------------------|
| Mean Diameter     | = 322.8 nm         | Variance (P.I.)     | = 0.097                        |
| Std. Deviation    | = 100.4 nm (31.1%) | Chi Squared         | = 64.604                       |
| Norm. Std. Dev.   | = 0.311            | Baseline Adj.       | = 1.099 %                      |
| (Coeff. of Var'n) |                    | Z-Avg. Diff. Coeff. | = 1.51E-008 cm <sup>2</sup> /s |

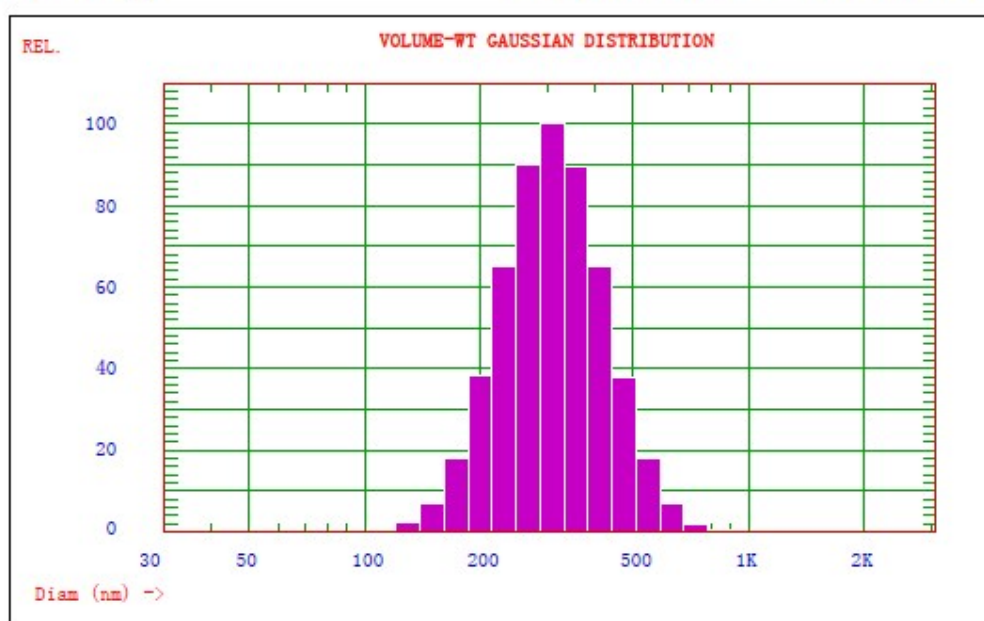

2016101201.5

Cumulative Result:

25 % of distribution < 249.2 nm  
50 % of distribution < 307.3 nm  
75 % of distribution < 379.1 nm  
90 % of distribution < 457.8 nm  
99 % of distribution < 633.6 nm  
80 % of distribution < 399.3 nm

Figure S6. AP-loaded RSF nanoparticles sizing distribution of No.5



VOLUME-Weighted GAUSSIAN DISTRIBUTION Analysis (Solid Particle)

GAUSSIAN SUMMARY:

|                   |                    |                     |                                |
|-------------------|--------------------|---------------------|--------------------------------|
| Mean Diameter     | = 996.9 nm         | Variance (P.I.)     | = 0.410                        |
| Std. Deviation    | = 638.0 nm (64.0%) | Chi Squared         | = 496.772                      |
| Norm. Std. Dev.   | = 0.640            | Baseline Adj.       | = 0.038 %                      |
| (Coeff. of Var'n) |                    | Z-Avg. Diff. Coeff. | = 6.79E-009 cm <sup>2</sup> /s |

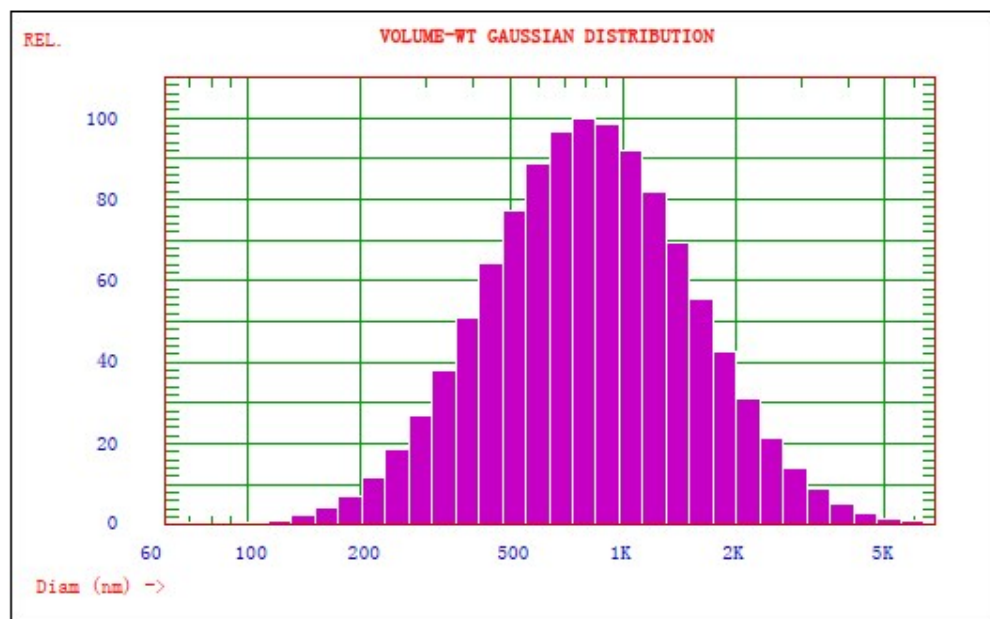

Run\_Sample

Cumulative Result:

25 % of distribution < 527.2 nm  
50 % of distribution < 811.6 nm  
75 % of distribution < 1249.3 nm  
90 % of distribution < 1841.1 nm  
99 % of distribution < 3561.8 nm  
80 % of distribution < 1390.2 nm

Figure S7. AP-loaded RSF nanoparticles sizing distribution of No.6



VOLUME-Weighted GAUSSIAN DISTRIBUTION Analysis (Solid Particle)

GAUSSIAN SUMMARY:

|                   |                    |                     |                                |
|-------------------|--------------------|---------------------|--------------------------------|
| Mean Diameter     | = 378.7 nm         | Variance (P.I.)     | = 0.412                        |
| Std. Deviation    | = 243.1 nm (64.2%) | Chi Squared         | = 568.010                      |
| Norm. Std. Dev.   | = 0.642            | Baseline Adj.       | = 0.037 %                      |
| (Coeff. of Var'n) |                    | Z-Avg. Diff. Coeff. | = 1.25E-008 cm <sup>2</sup> /s |

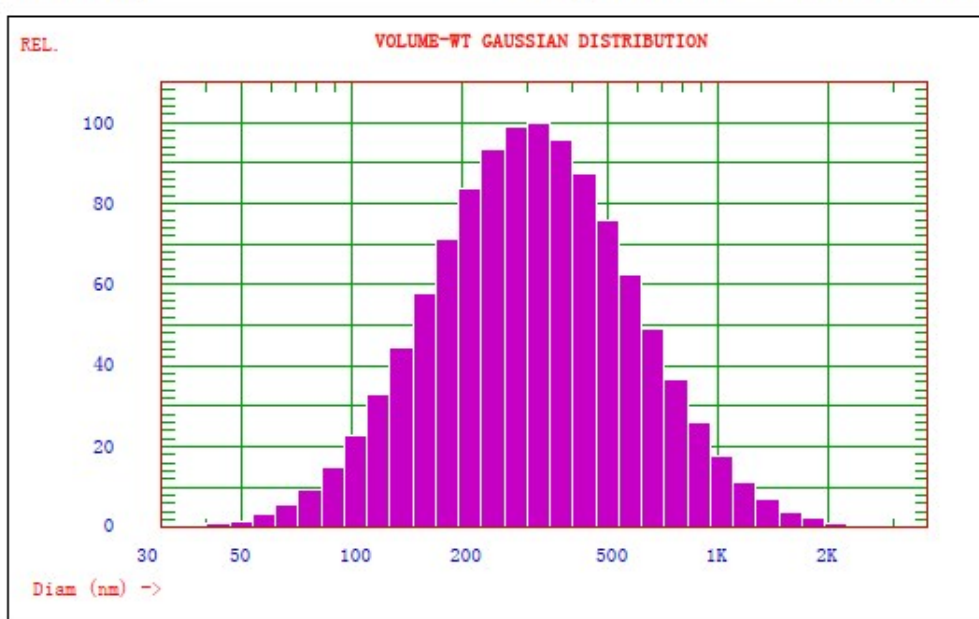

Run\_Sample

Cumulative Result:

25 % of distribution < 200.1 nm  
50 % of distribution < 308.3 nm  
75 % of distribution < 475.2 nm  
90 % of distribution < 701.4 nm  
99 % of distribution < 1370.2 nm  
80 % of distribution < 528.9 nm

Figure S8. AP-loaded RSF nanoparticles sizing distribution of No.7

**VOLUME-Weighted GAUSSIAN DISTRIBUTION Analysis (Solid Particle)**

**GAUSSIAN SUMMARY:**

|                   |                    |                     |                                |
|-------------------|--------------------|---------------------|--------------------------------|
| Mean Diameter     | = 623.0 nm         | Variance (P.I.)     | = 0.477                        |
| Std. Deviation    | = 430.5 nm (69.1%) | Chi Squared         | = 52.596                       |
| Norm. Std. Dev.   | = 0.691            | Baseline Adj.       | = 0.000 %                      |
| (Coeff. of Var'n) |                    | Z-Avg. Diff. Coeff. | = 9.60E-009 cm <sup>2</sup> /s |

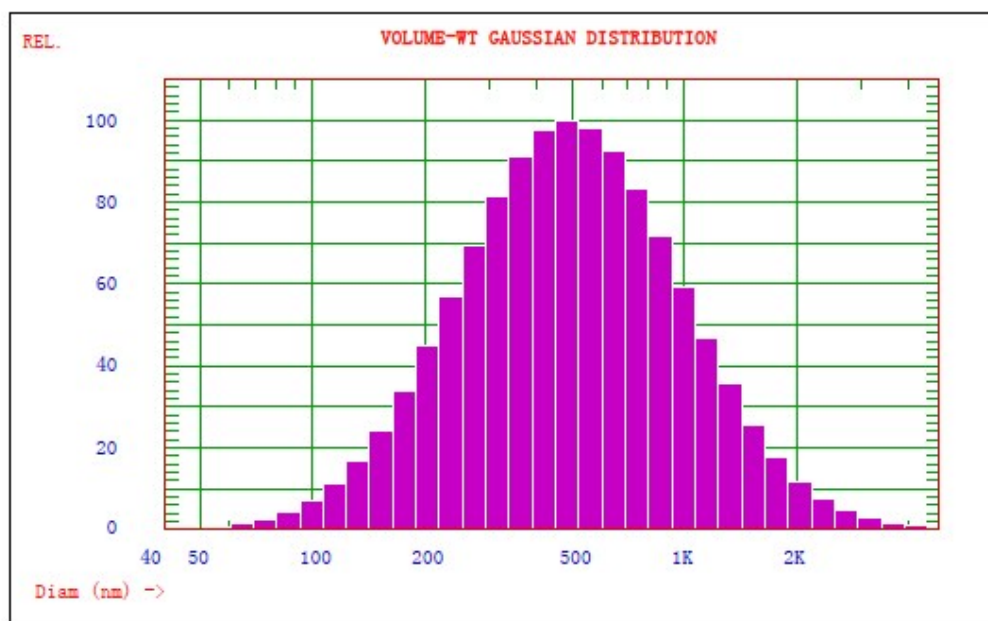

*Run\_Sample*

**Cumulative Result:**

25 % of distribution < 308.1 nm  
50 % of distribution < 490.6 nm  
75 % of distribution < 781.4 nm  
90 % of distribution < 1187.5 nm  
99 % of distribution < 2419.7 nm  
80 % of distribution < 876.9 nm

**Figure S9. AP-loaded RSF nanoparticles sizing distribution of No.8**

VOLUME-Weighted GAUSSIAN DISTRIBUTION Analysis (Solid Particle)

GAUSSIAN SUMMARY:

|                   |                     |                     |                                |
|-------------------|---------------------|---------------------|--------------------------------|
| Mean Diameter     | = 8693.5 nm         | Variance (P.I.)     | = 0.762                        |
| Std. Deviation    | = 7589.4 nm (87.3%) | Chi Squared         | = 17254.455                    |
| Norm. Std. Dev.   | = 0.873             | Baseline Adj.       | = 0.000 %                      |
| (Coeff. of Var'n) |                     | Z-Avg. Diff. Coeff. | = 1.07E-009 cm <sup>2</sup> /s |

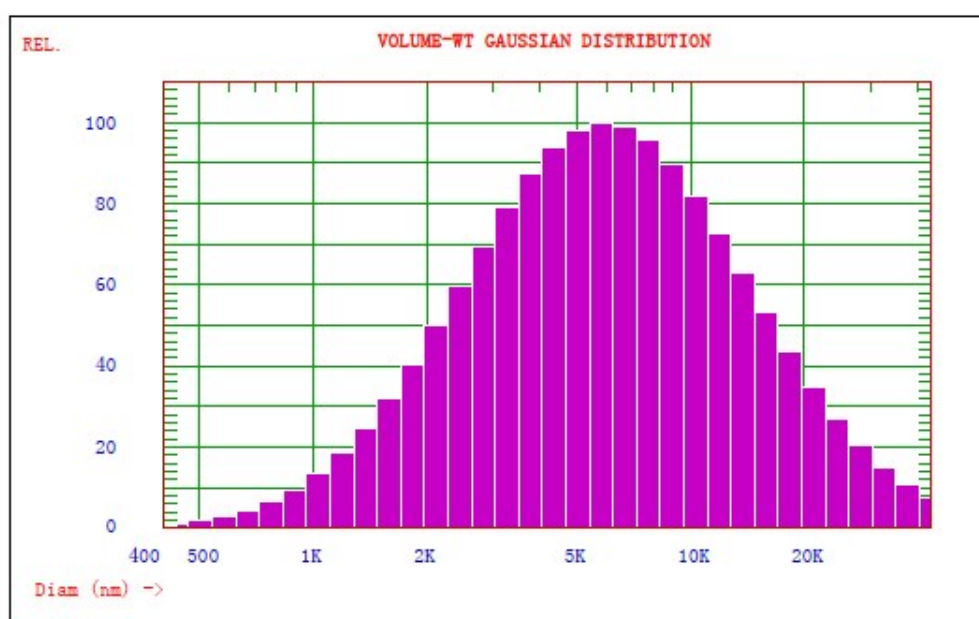

Run\_Sample

Cumulative Result:

25 % of distribution < 3284.3 nm  
50 % of distribution < 5877.6 nm  
75 % of distribution < 10467.6 nm  
90 % of distribution < 17322.9 nm  
99 % of distribution < 34935.6 nm  
80 % of distribution < 12052.8 nm

Figure S10. AP-loaded RSF nanoparticles sizing distribution of No.9

VOLUME-Weighted GAUSSIAN DISTRIBUTION Analysis (Solid Particle)

GAUSSIAN SUMMARY:

|                   |                    |                     |                                |
|-------------------|--------------------|---------------------|--------------------------------|
| Mean Diameter     | = 238.9 nm         | Variance (P.I.)     | = 0.312                        |
| Std. Deviation    | = 133.5 nm (55.9%) | Chi Squared         | = 2006.459                     |
| Norm. Std. Dev.   | = 0.559            | Baseline Adj.       | = 0.058 %                      |
| (Coeff. of Var'n) |                    | Z-Avg. Diff. Coeff. | = 1.62E-008 cm <sup>2</sup> /s |

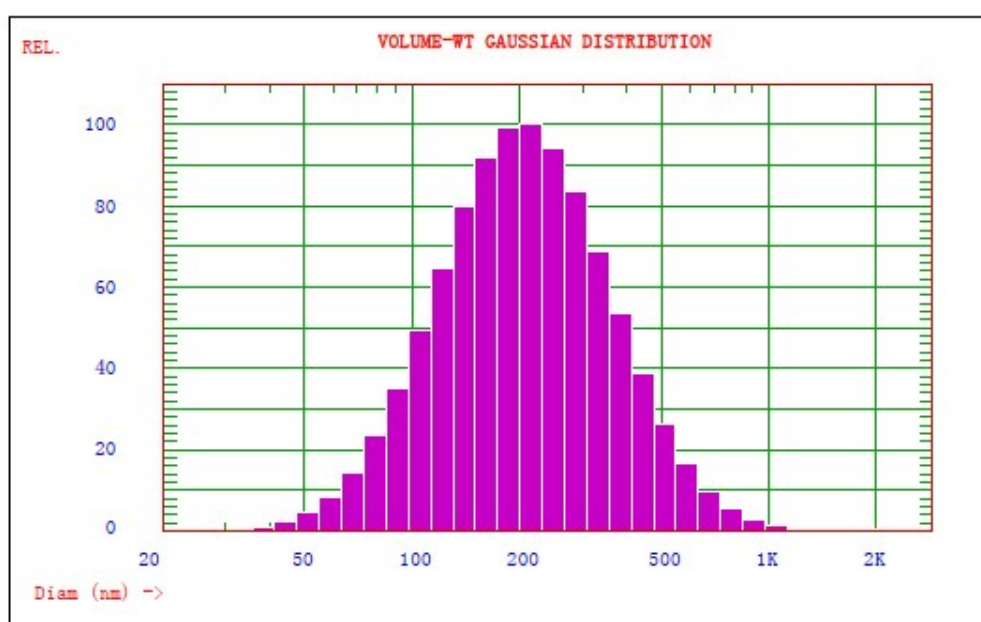

2016101201.10

Cumulative Result:

25 % of distribution < 140.2 nm  
50 % of distribution < 204.3 nm  
75 % of distribution < 297.8 nm  
90 % of distribution < 418.1 nm  
99 % of distribution < 749.7 nm  
80 % of distribution < 327.0 nm

Figure S11. AP-loaded RSF nanoparticles sizing distribution of No.10

VOLUME-Weighted GAUSSIAN DISTRIBUTION Analysis (Solid Particle)

GAUSSIAN SUMMARY:

|                   |                    |                     |                                |
|-------------------|--------------------|---------------------|--------------------------------|
| Mean Diameter     | = 503.4 nm         | Variance (P.I.)     | = 0.333                        |
| Std. Deviation    | = 290.4 nm (57.7%) | Chi Squared         | = 138.355                      |
| Norm. Std. Dev.   | = 0.577            | Baseline Adj.       | = 0.057 %                      |
| (Coeff. of Var'n) |                    | Z-Avg. Diff. Coeff. | = 1.10E-008 cm <sup>2</sup> /s |

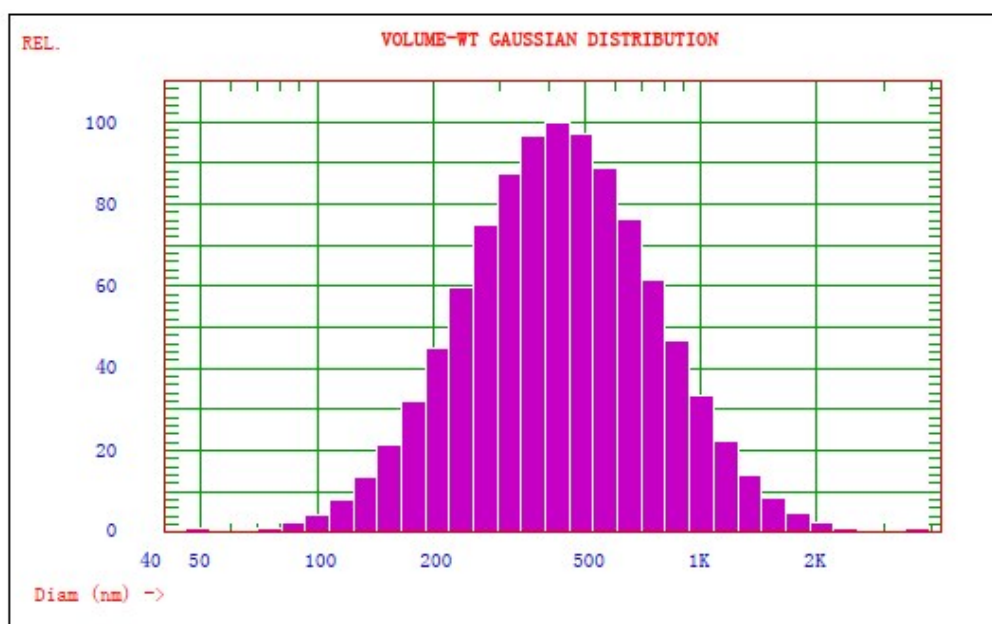

*Run\_Sample*

Cumulative Result:

25 % of distribution < 288.6 nm  
50 % of distribution < 425.9 nm  
75 % of distribution < 628.6 nm  
90 % of distribution < 892.2 nm  
99 % of distribution < 1629.2 nm

Figure S12. AP-loaded RSF nanoparticles sizing distribution of No.11

INTENSITY-Weighted GAUSSIAN DISTRIBUTION Analysis (Solid Particle)

GAUSSIAN SUMMARY:

|                   |                    |                     |                                |
|-------------------|--------------------|---------------------|--------------------------------|
| Mean Diameter     | = 695.9 nm         | Variance (P.I.)     | = 0.254                        |
| Std. Deviation    | = 350.7 nm (50.4%) | Chi Squared         | = 50.632                       |
| Norm. Std. Dev.   | = 0.504            | Baseline Adj.       | = 0.000 %                      |
| (Coeff. of Var'n) |                    | Z-Avg. Diff. Coeff. | = 6.68E-009 cm <sup>2</sup> /s |

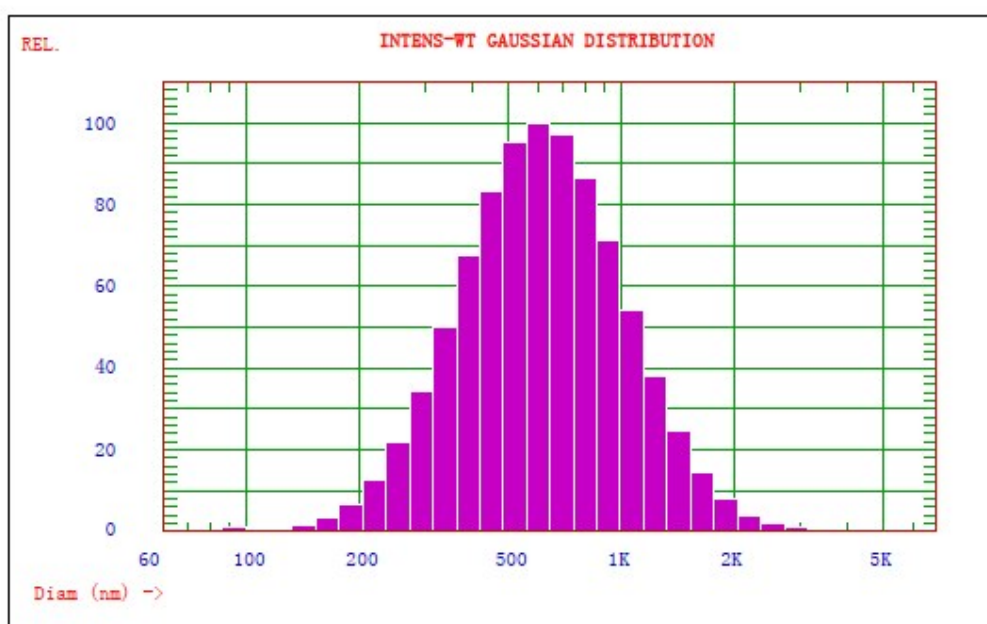

Run\_Sample

Cumulative Result:

25 % of distribution < 436.1 nm  
50 % of distribution < 612.6 nm  
75 % of distribution < 860.6 nm  
90 % of distribution < 1168.6 nm  
99 % of distribution < 1978.6 nm  
80 % of distribution < 936.2 nm

Figure S13. AP-loaded RSF nanoparticles sizing distribution of No.12



VOLUME-Weighted GAUSSIAN DISTRIBUTION Analysis (Solid Particle)

GAUSSIAN SUMMARY:

|                   |                    |                     |                                |
|-------------------|--------------------|---------------------|--------------------------------|
| Mean Diameter     | = 495.7 nm         | Variance (P.I.)     | = 0.479                        |
| Std. Deviation    | = 343.1 nm (69.2%) | Chi Squared         | = 393.217                      |
| Norm. Std. Dev.   | = 0.692            | Baseline Adj.       | = 0.000 %                      |
| (Coeff. of Var'n) |                    | Z-Avg. Diff. Coeff. | = 1.08E-008 cm <sup>2</sup> /s |

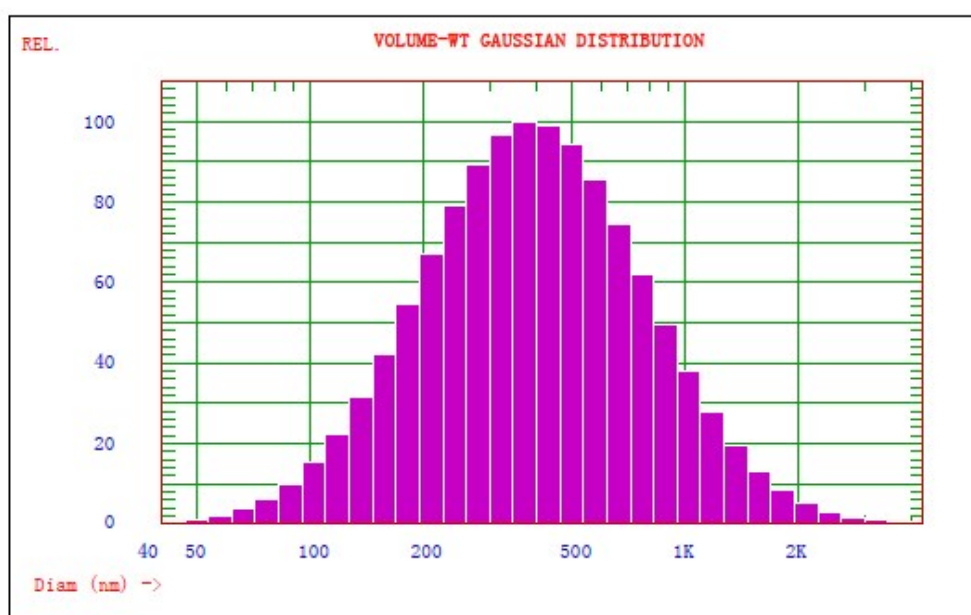

Run\_Sample

Cumulative Result:

25 % of distribution < 245.1 nm  
50 % of distribution < 390.4 nm  
75 % of distribution < 622.2 nm  
90 % of distribution < 946.3 nm  
99 % of distribution < 1938.5 nm  
80 % of distribution < 698.3 nm

Figure S14. AP-loaded RSF nanoparticles sizing distribution of No.13



VOLUME-Weighted GAUSSIAN DISTRIBUTION Analysis (Solid Particle)

GAUSSIAN SUMMARY:

|                   |                    |                     |                                |
|-------------------|--------------------|---------------------|--------------------------------|
| Mean Diameter     | = 495.7 nm         | Variance (P.I.)     | = 0.479                        |
| Std. Deviation    | = 343.1 nm (69.2%) | Chi Squared         | = 393.217                      |
| Norm. Std. Dev.   | = 0.692            | Baseline Adj.       | = 0.000 %                      |
| (Coeff. of Var'n) |                    | Z-Avg. Diff. Coeff. | = 1.08E-008 cm <sup>2</sup> /s |

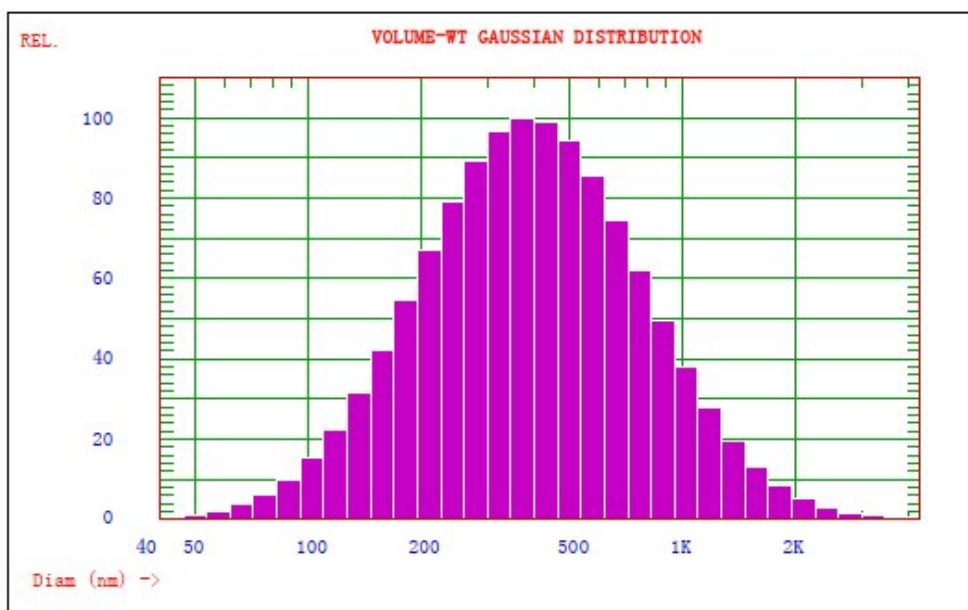

Run\_Sample

Cumulative Result:

25 % of distribution < 245.1 nm  
50 % of distribution < 390.4 nm  
75 % of distribution < 622.2 nm  
90 % of distribution < 946.3 nm  
99 % of distribution < 1938.5 nm  
80 % of distribution < 698.3 nm

Figure S15. AP-loaded RSF nanoparticles sizing distribution of No.14

VOLUME-Weighted GAUSSIAN DISTRIBUTION Analysis (Solid Particle)

GAUSSIAN SUMMARY:

|                   |                    |                     |                                |
|-------------------|--------------------|---------------------|--------------------------------|
| Mean Diameter     | = 372.0 nm         | Variance (P.I.)     | = 0.172                        |
| Std. Deviation    | = 154.4 nm (41.5%) | Chi Squared         | = 76.511                       |
| Norm. Std. Dev.   | = 0.415            | Baseline Adj.       | = 1.084 %                      |
| (Coeff. of Var'n) |                    | Z-Avg. Diff. Coeff. | = 1.36E-008 cm <sup>2</sup> /s |

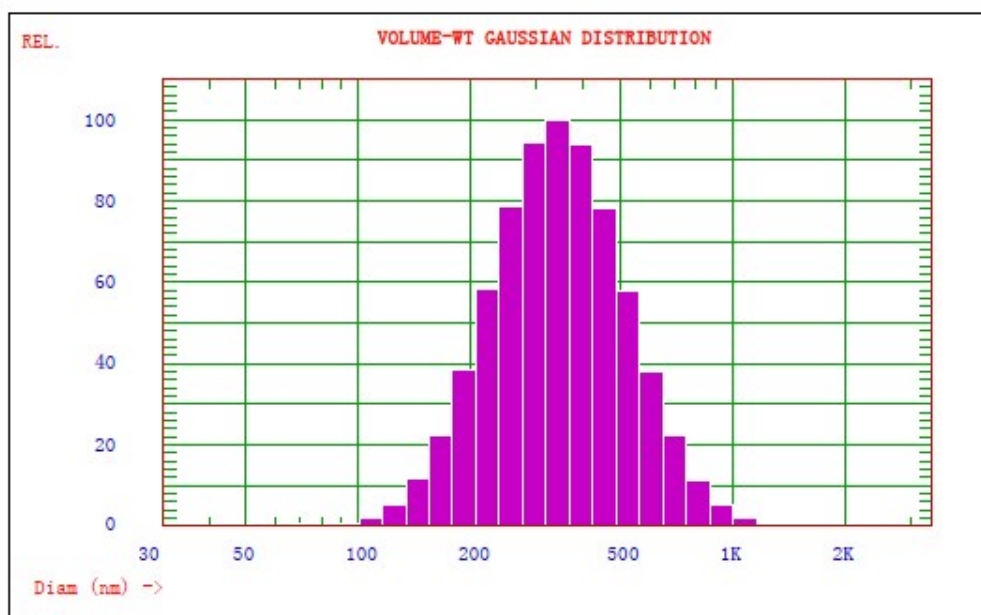

Run\_Sample

Cumulative Result:

25 % of distribution < 257.8 nm  
50 % of distribution < 341.1 nm  
75 % of distribution < 451.2 nm  
90 % of distribution < 580.5 nm  
99 % of distribution < 895.6 nm  
80 % of distribution < 483.7 nm

Figure S16. AP-loaded RSF nanoparticles sizing distribution of No.16

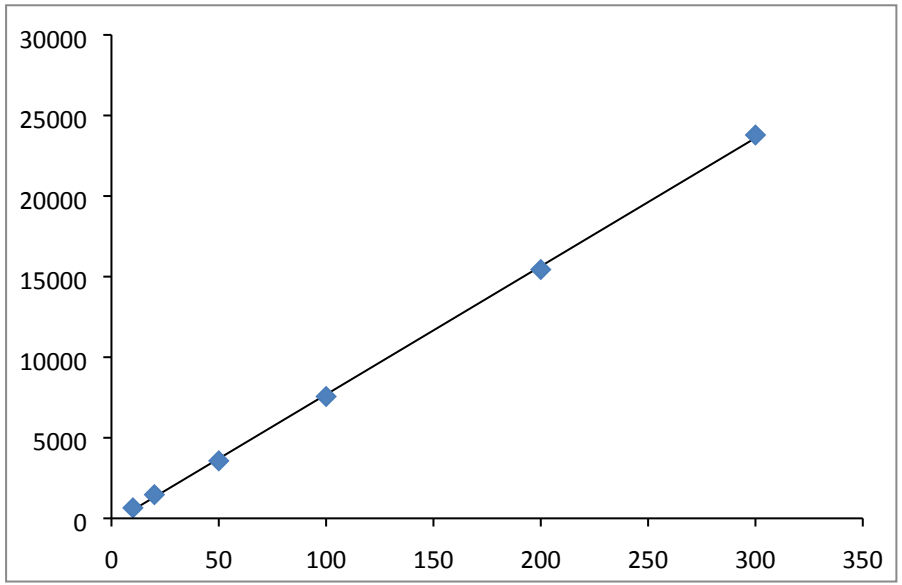

**Figure S17** Standard curve of AP by HPLC

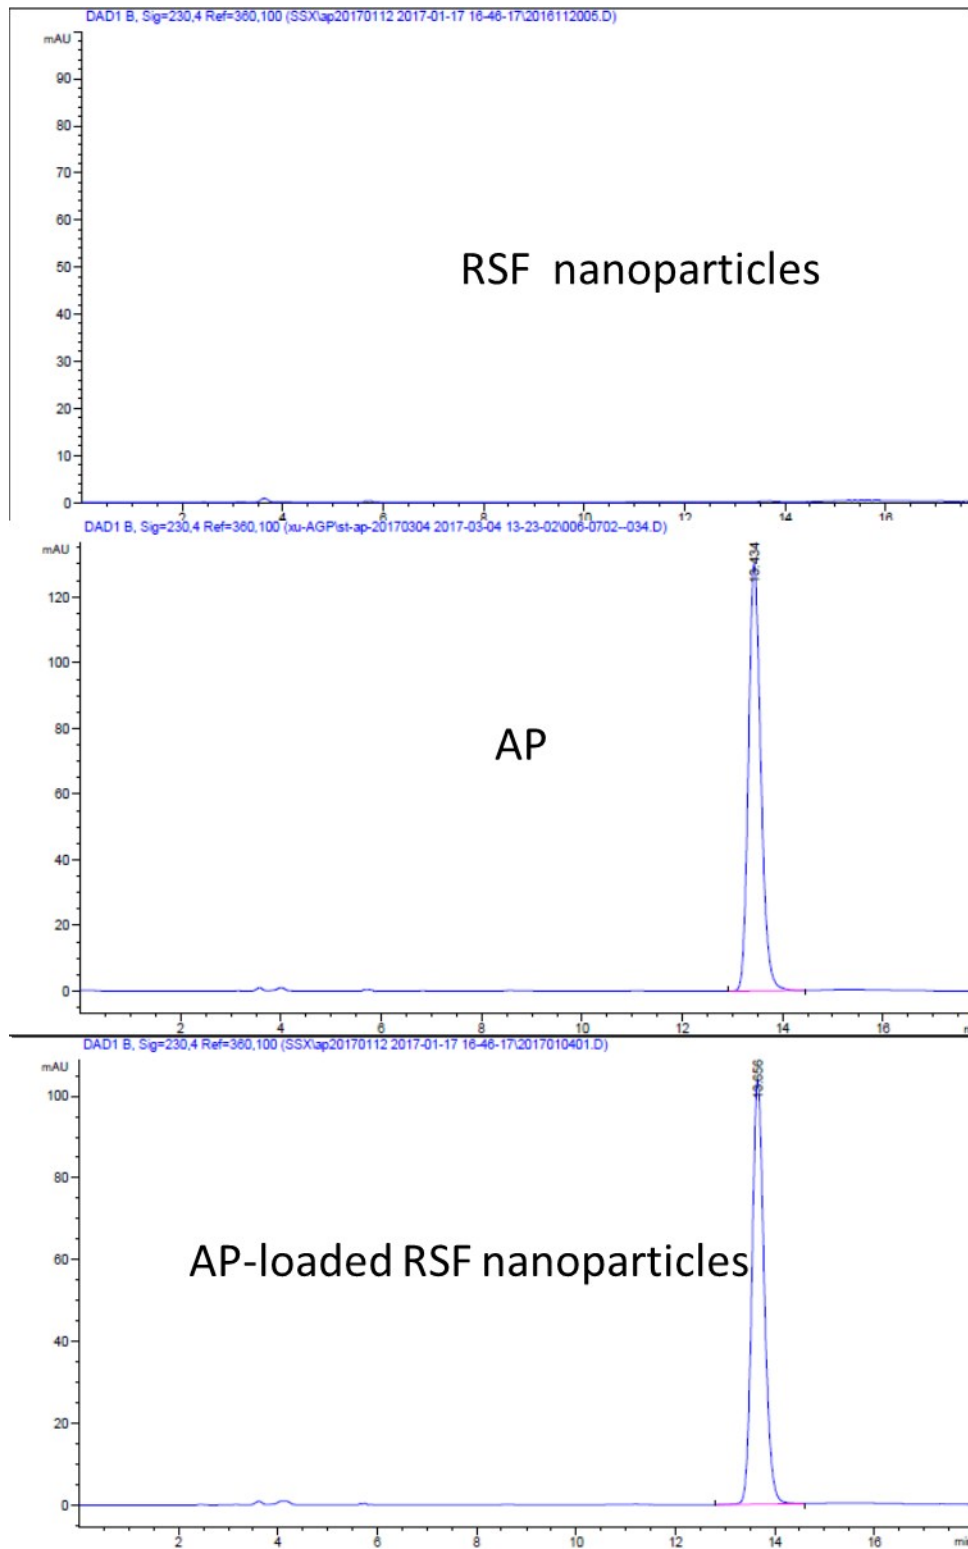

Figure S18 HPLC of AP-loaded RSFnanoparticle

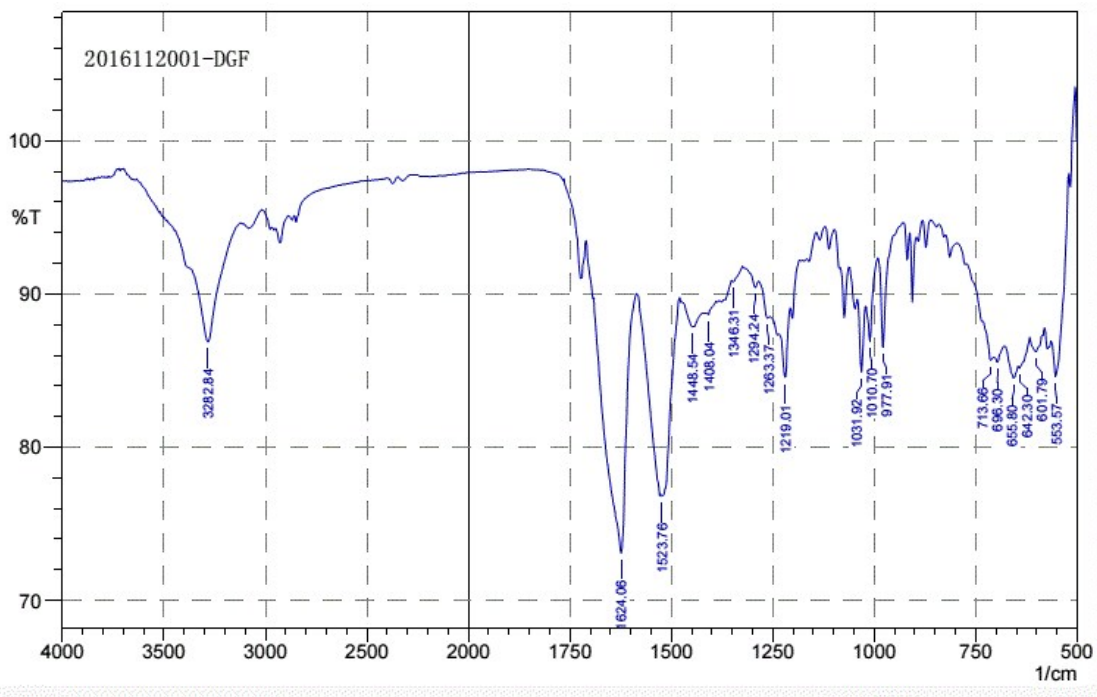

Figure S19 FT-IR spectra of RSFNPs1

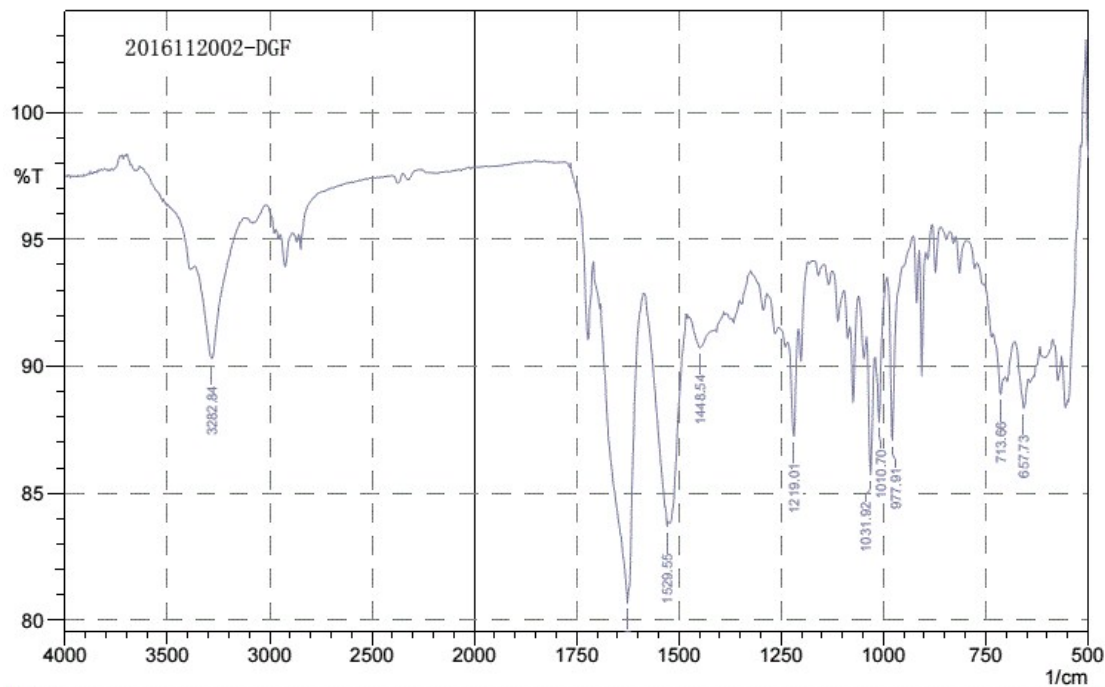

Figure S20 FT-IR spectra of RSFNPs2

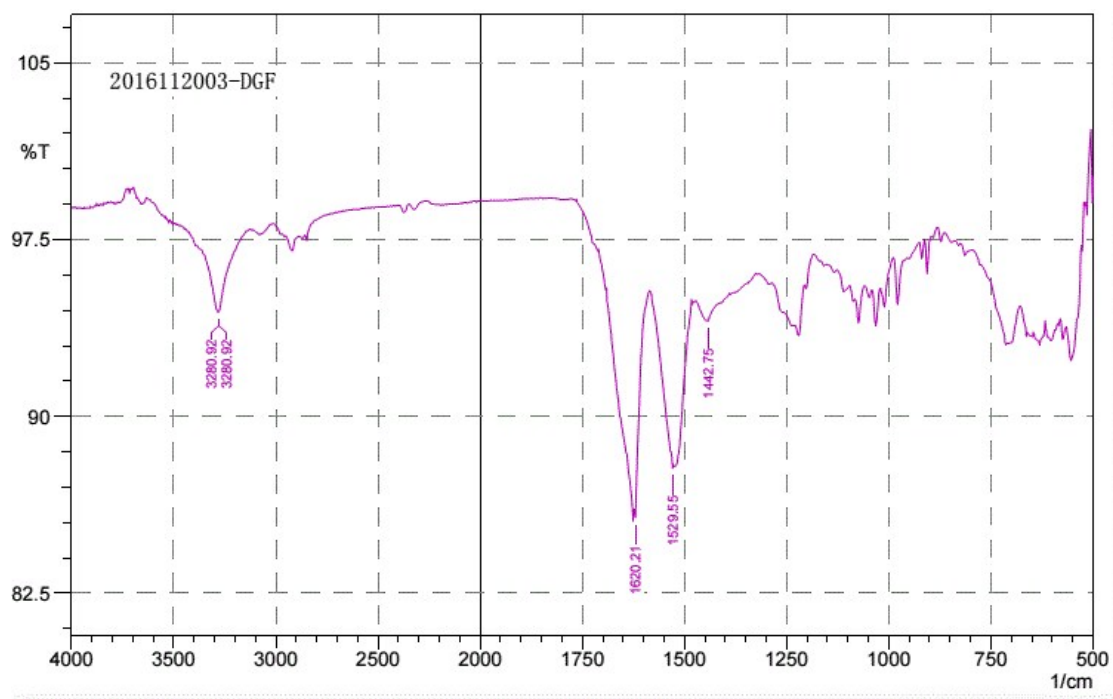

Figure S21 FT-IR spectra of RSNPs3

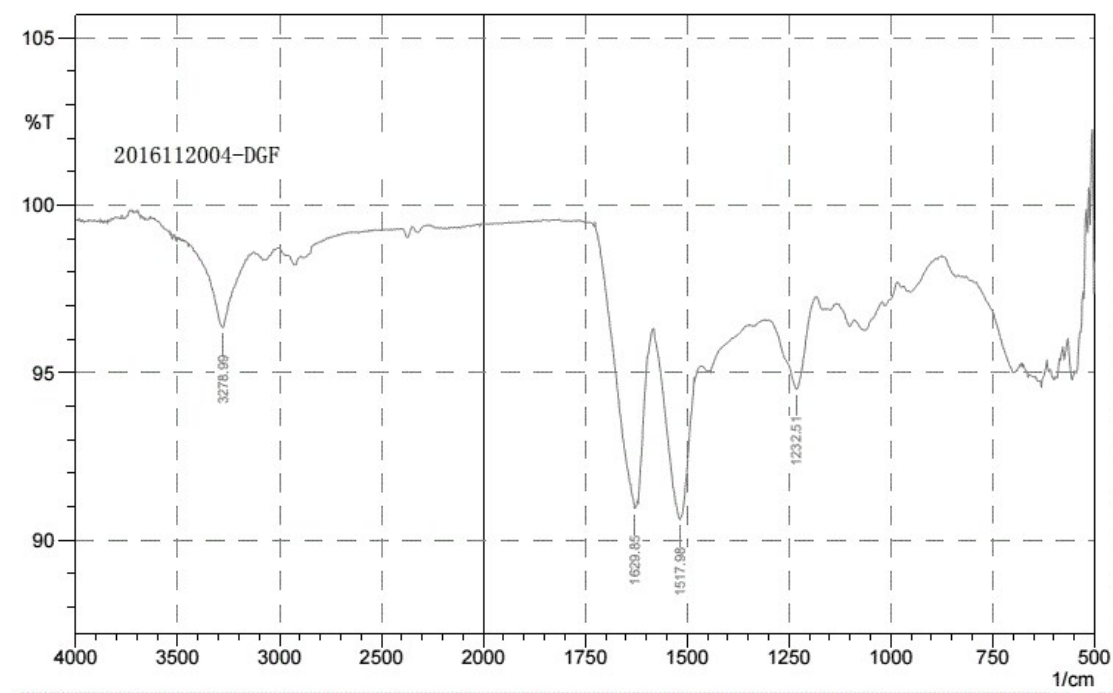

Figure S22 FT-IR spectra of RSNPs4

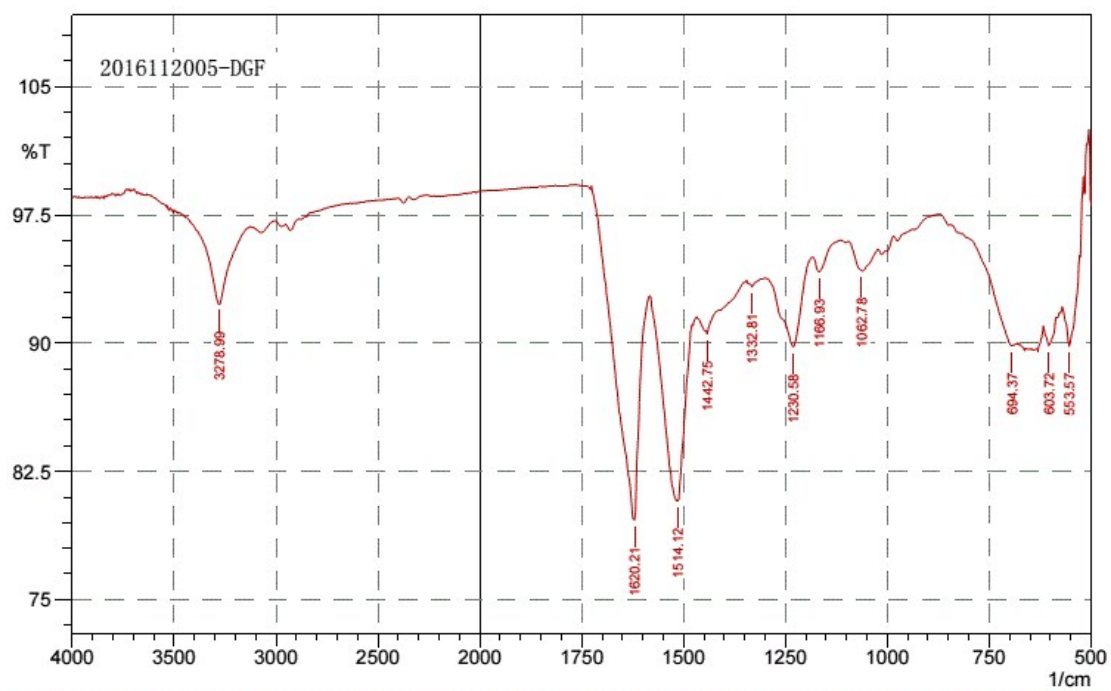

Figure S23 FT-IR spectra of RSNPs5

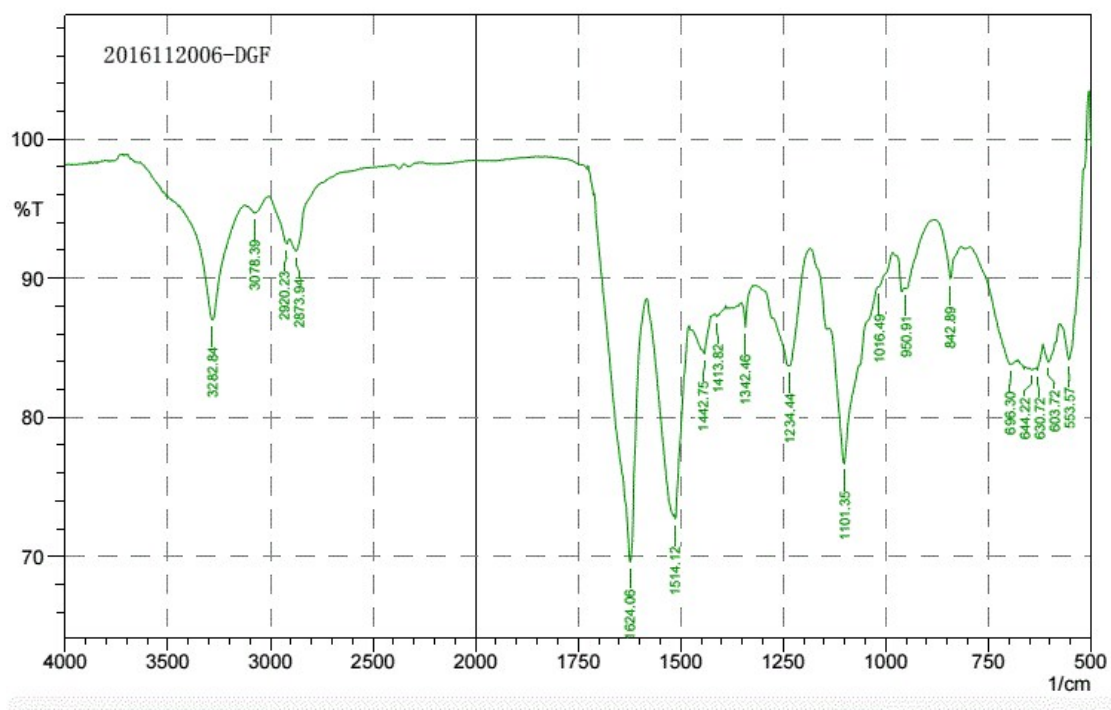

Figure S24 FT-IR spectra of RSNPs6



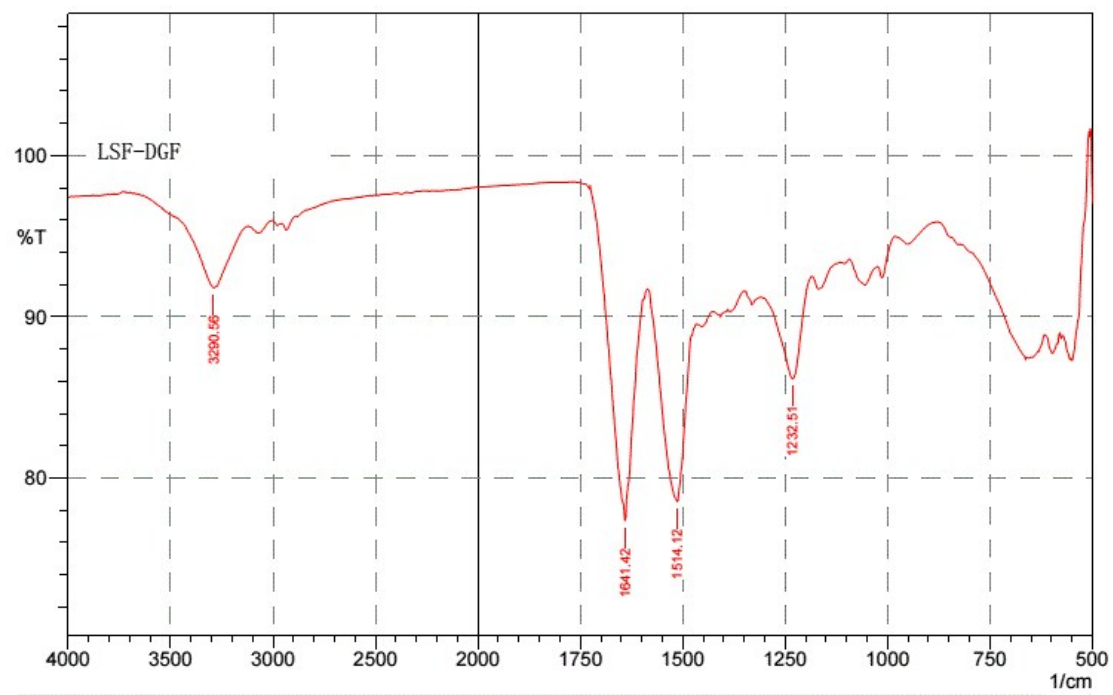

Figure S25 FT-IR spectra of RSF

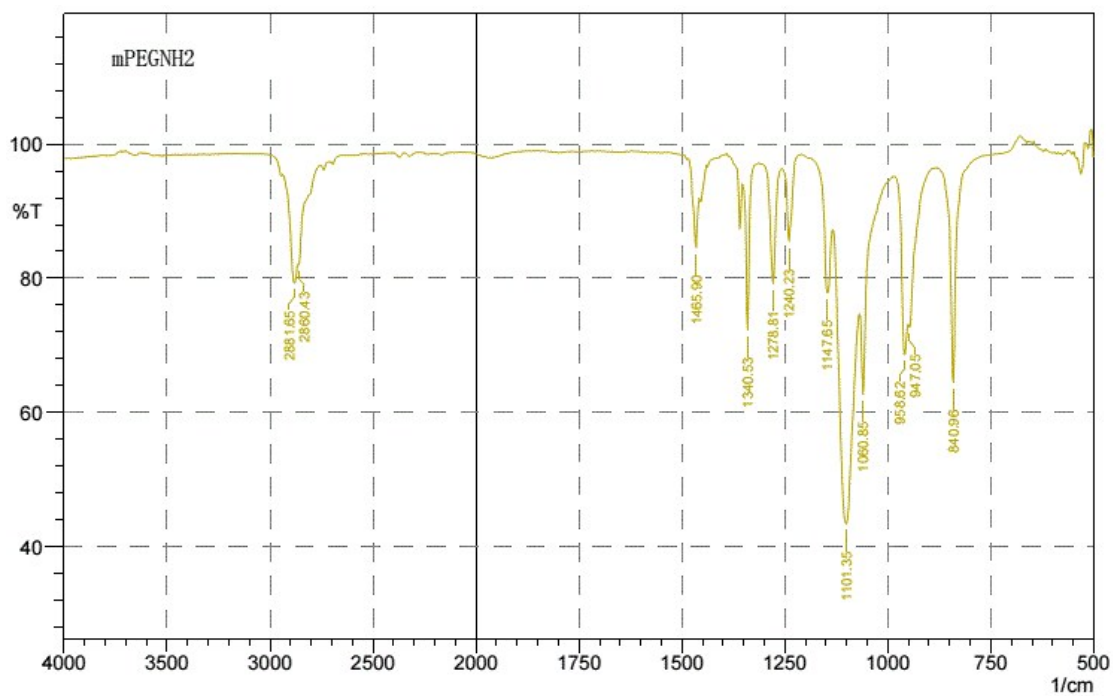

Figure S26 FT-IR spectra of mPEGNH<sub>2</sub>

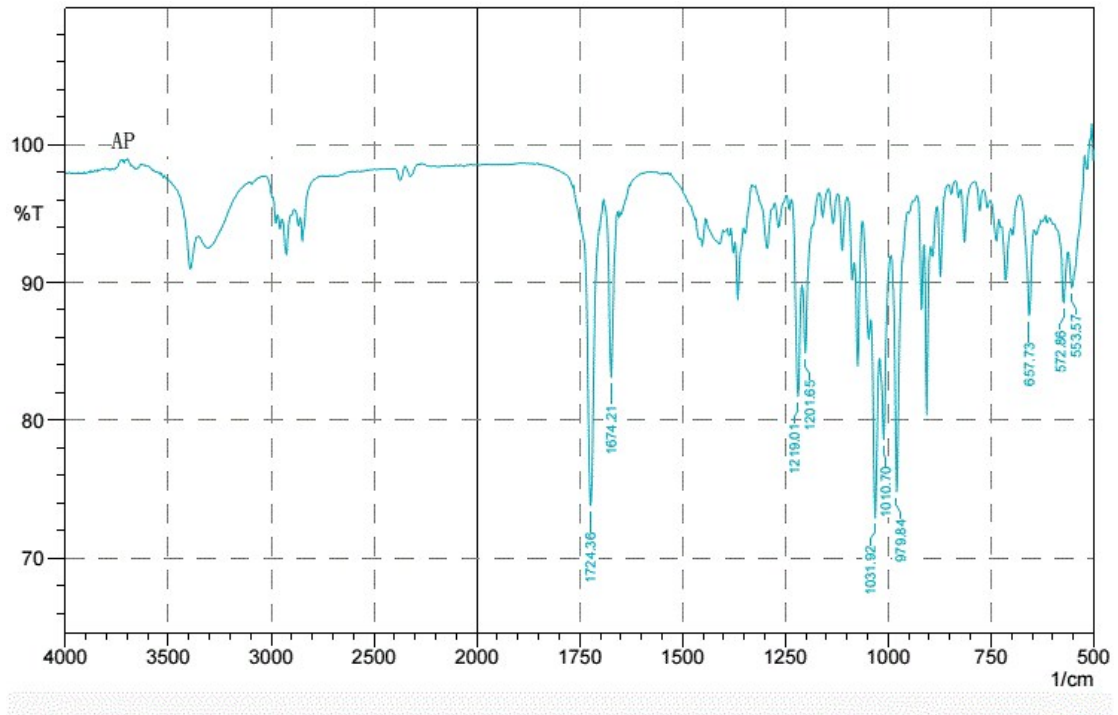

**Figure S27** FT-IR spectra of AP

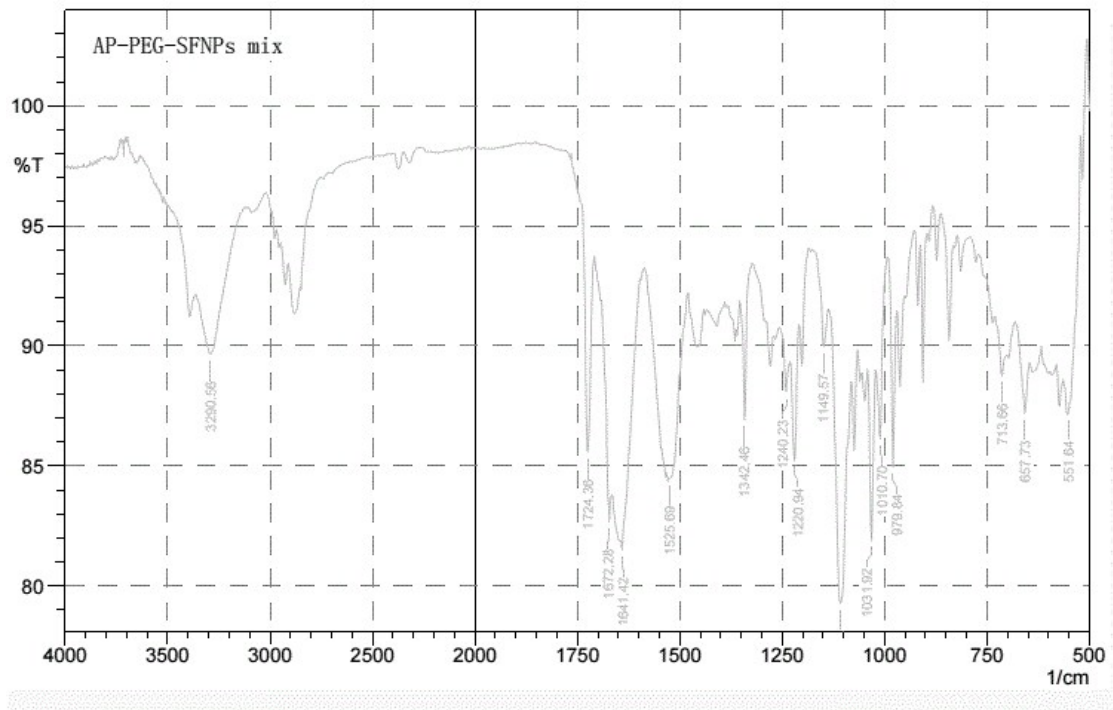

**Figure S28** FT-IR spectra of physical mixture of AP, PEG and SFNPs
